# Supplementary material for: The mechanism of Sanzi Yangqin decoction for asthma treatment based on network pharmacology and experimental verification
Source: Springer Nature journal article supplement (doi:10.1186/s12906-023-04272-6), 2023-12-13

Fig 4 F (mice)

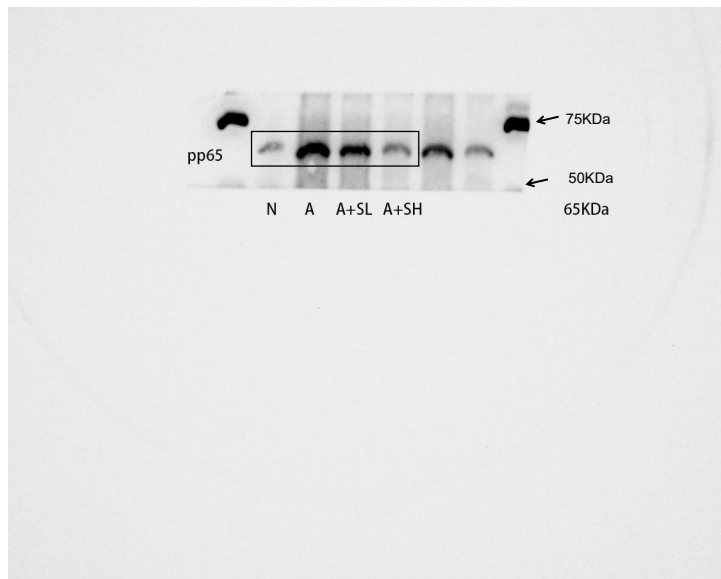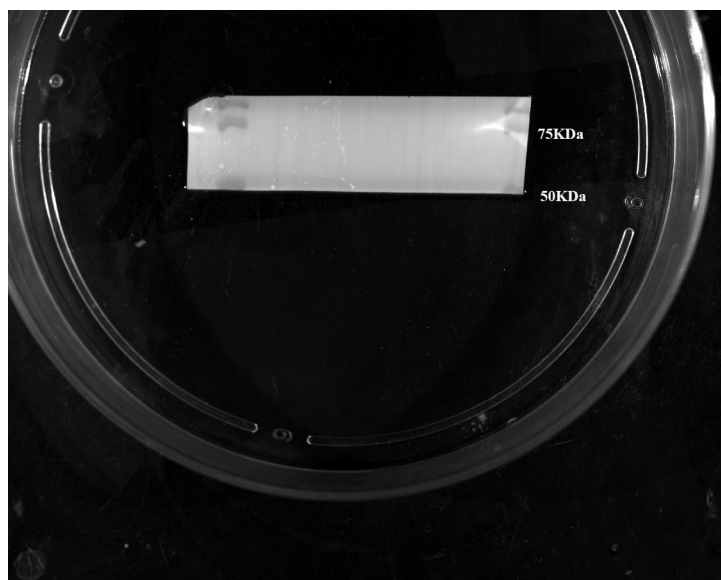

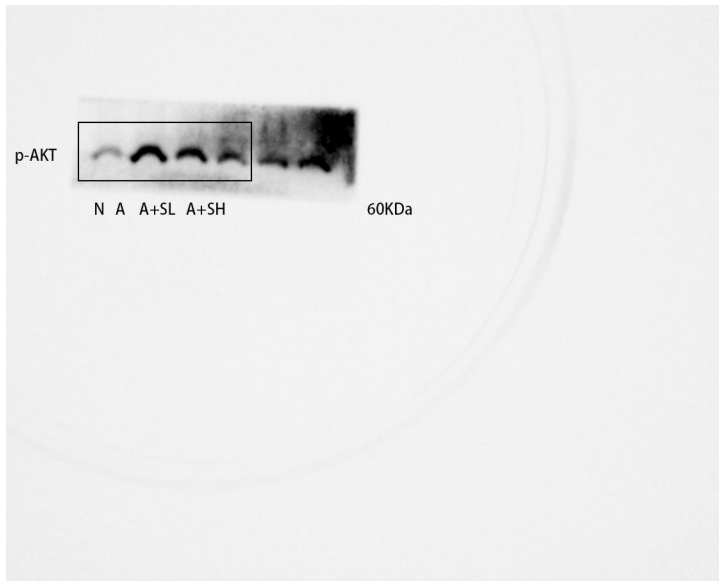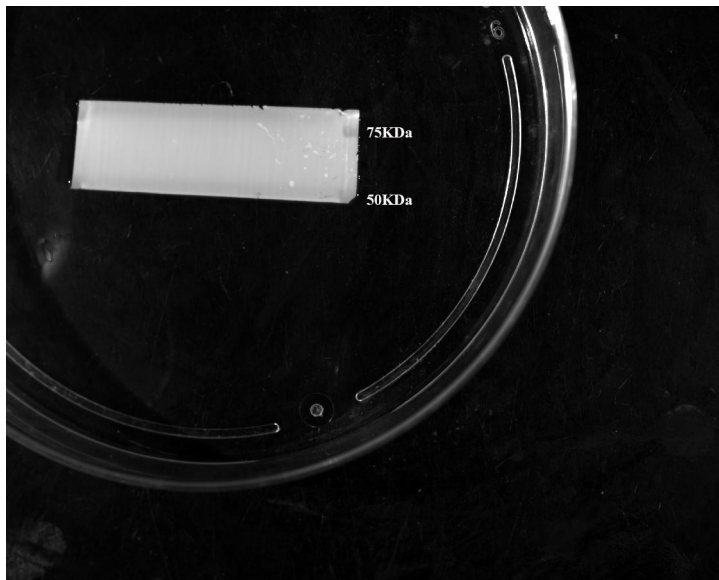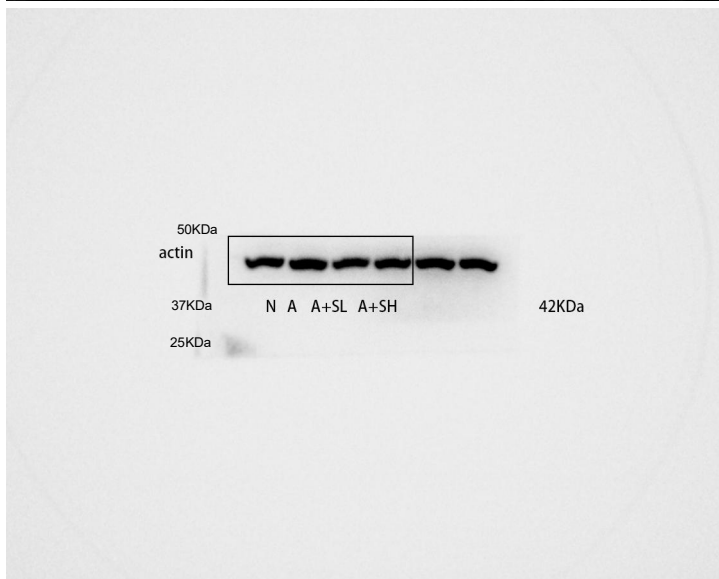

Fig 5C (cell)

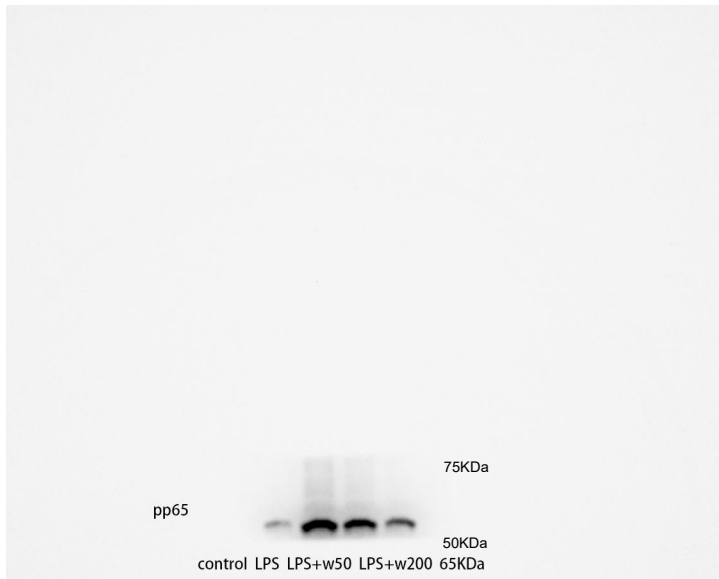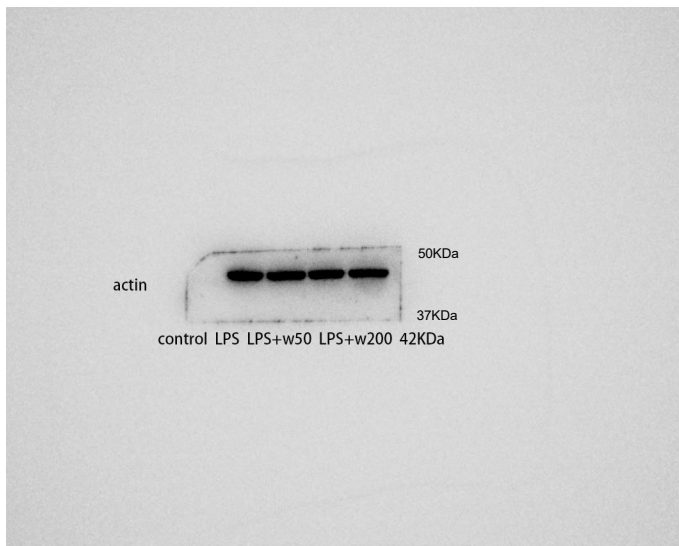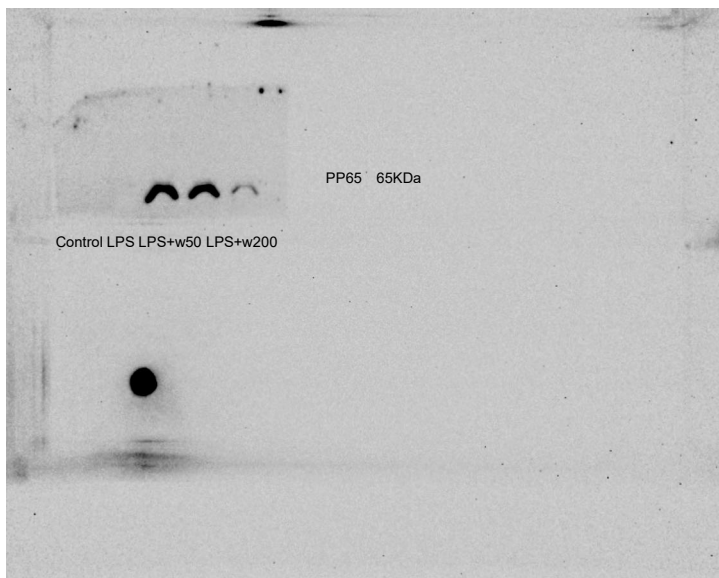

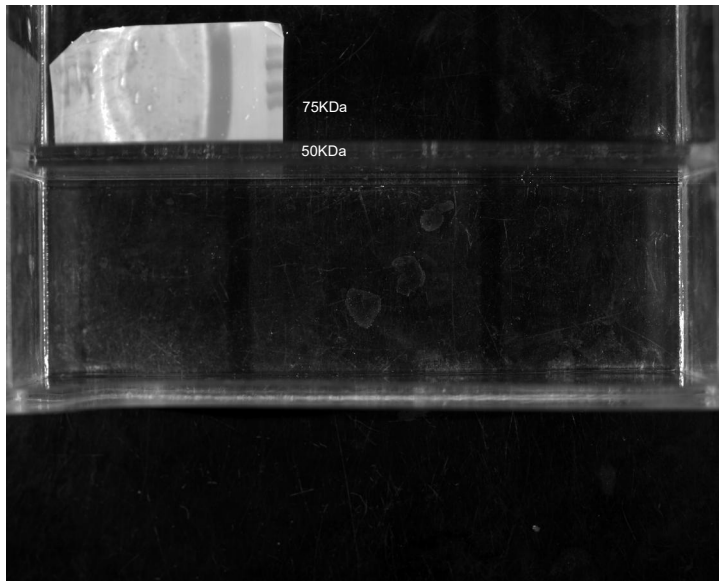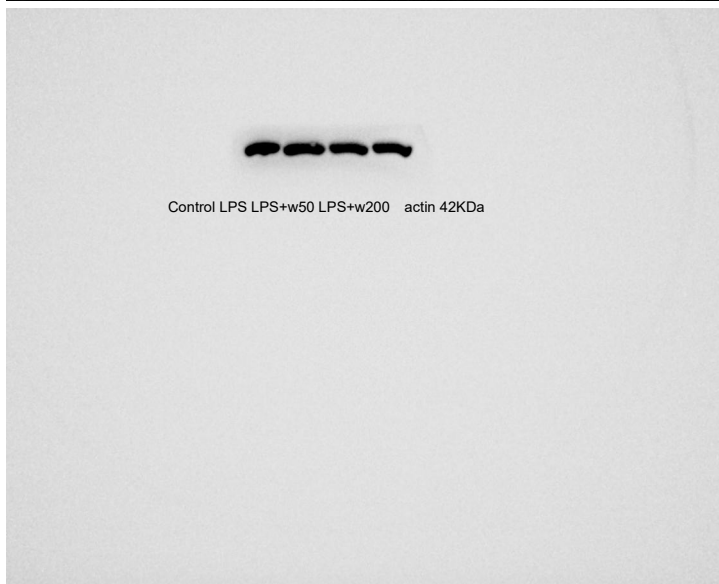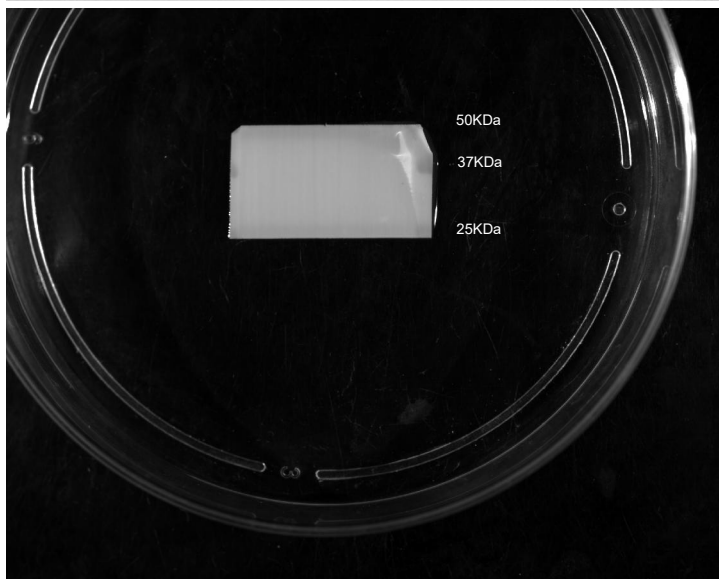

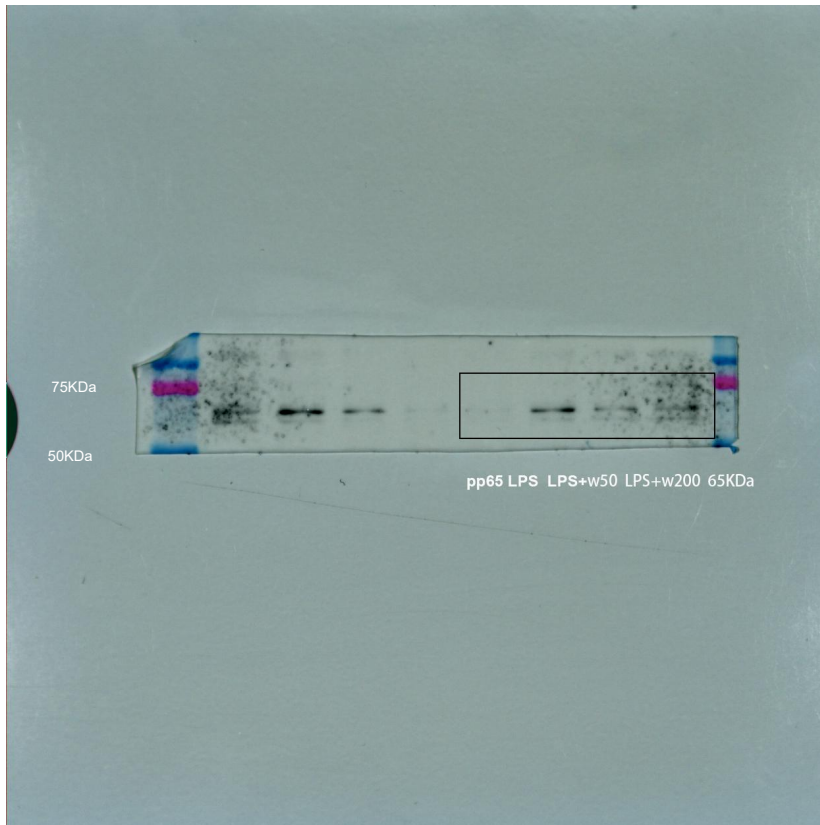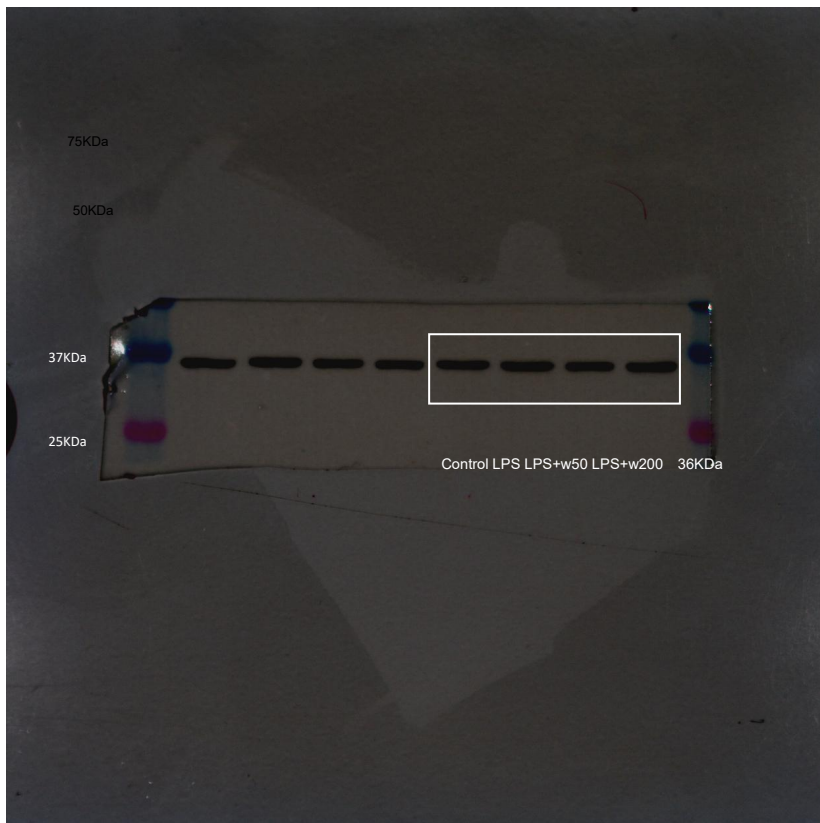

Fig 5F

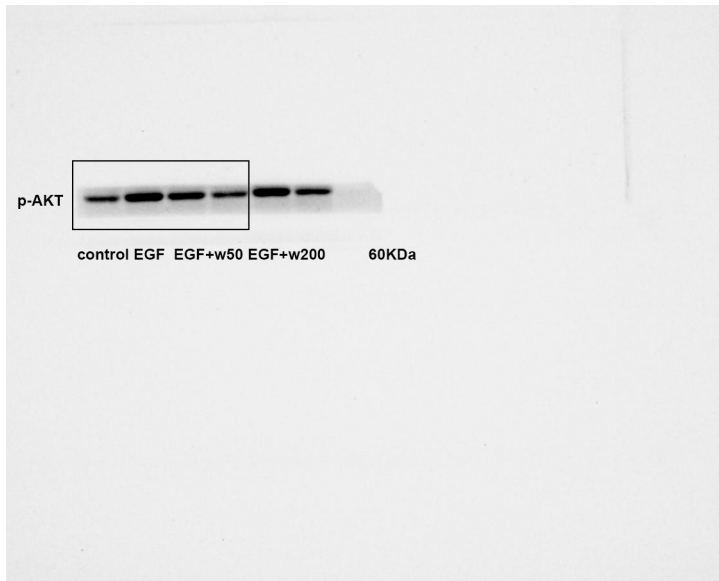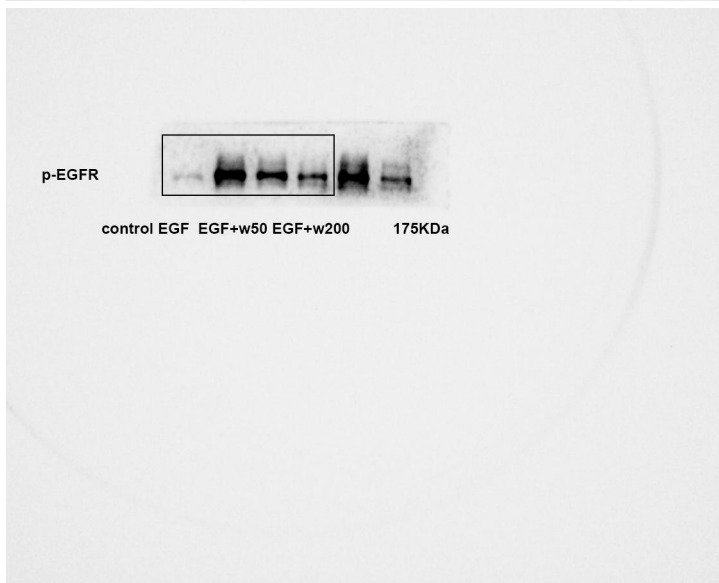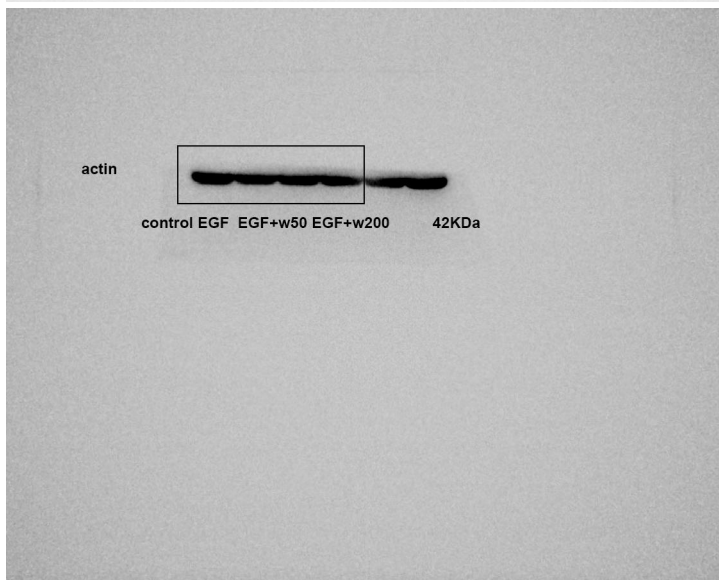

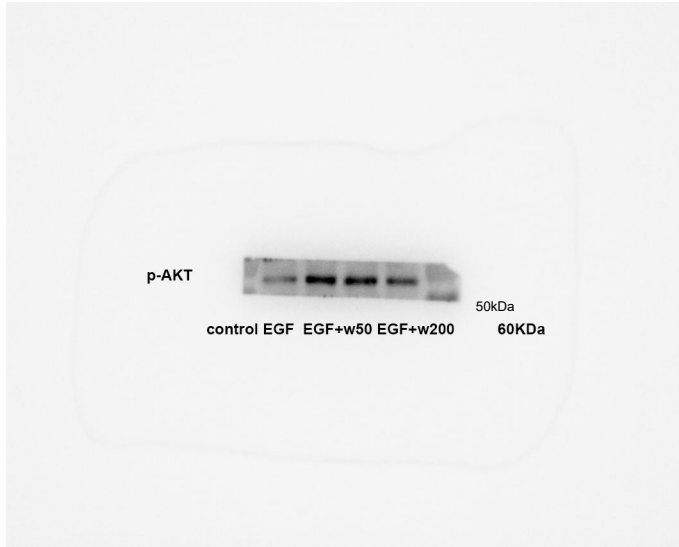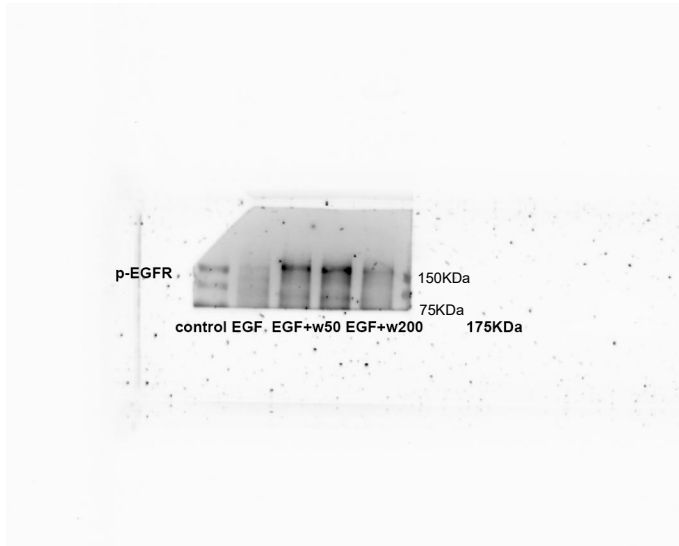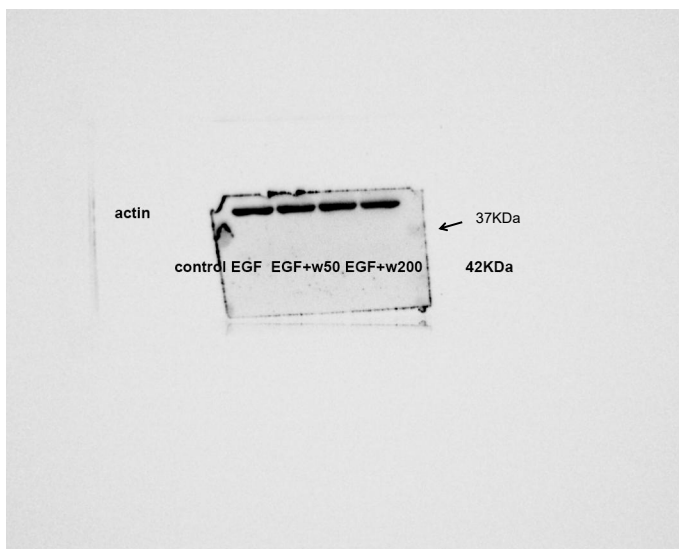

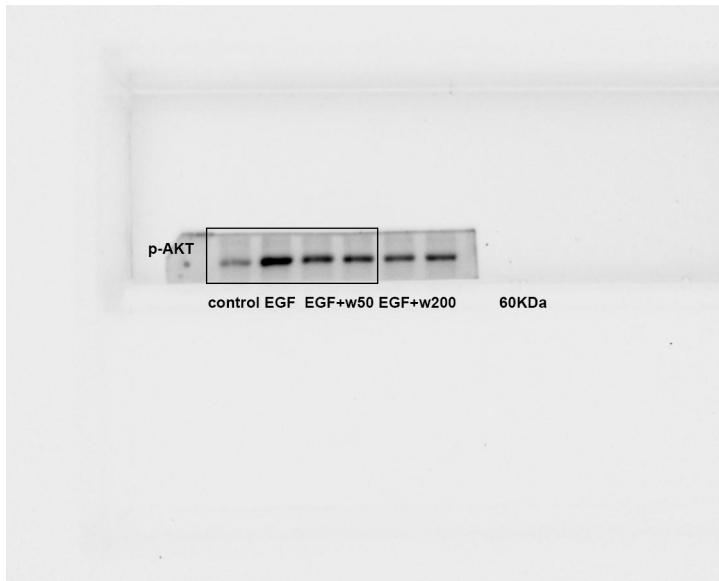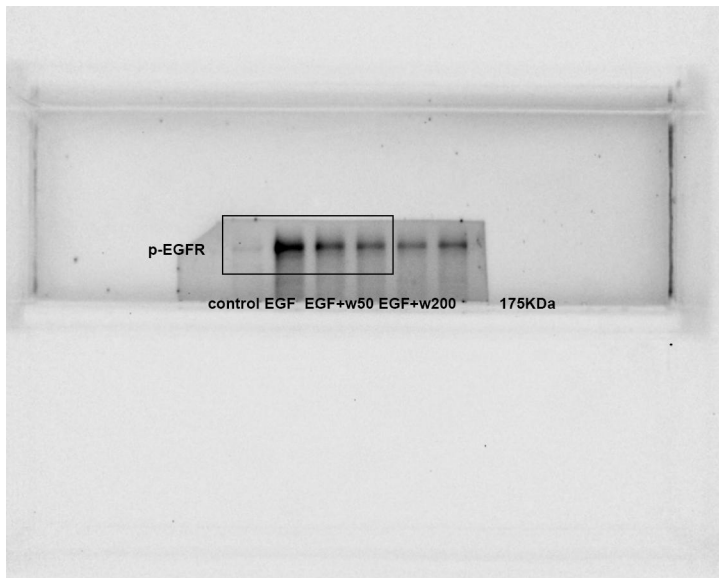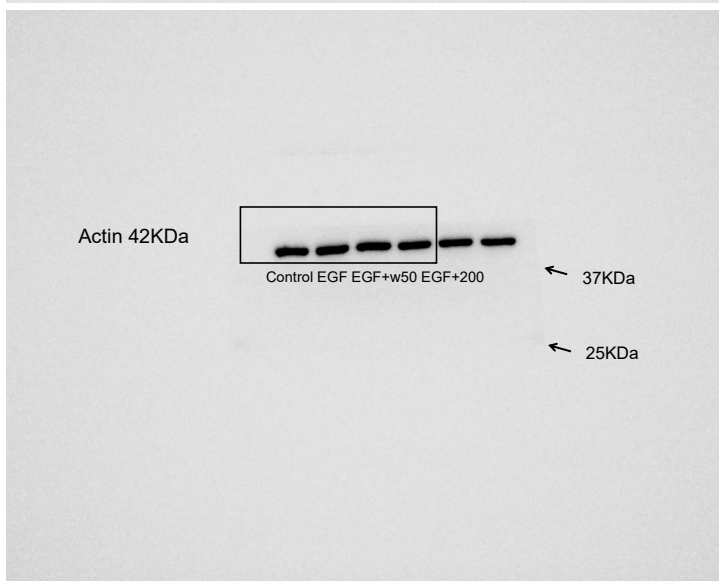



Fig 7C

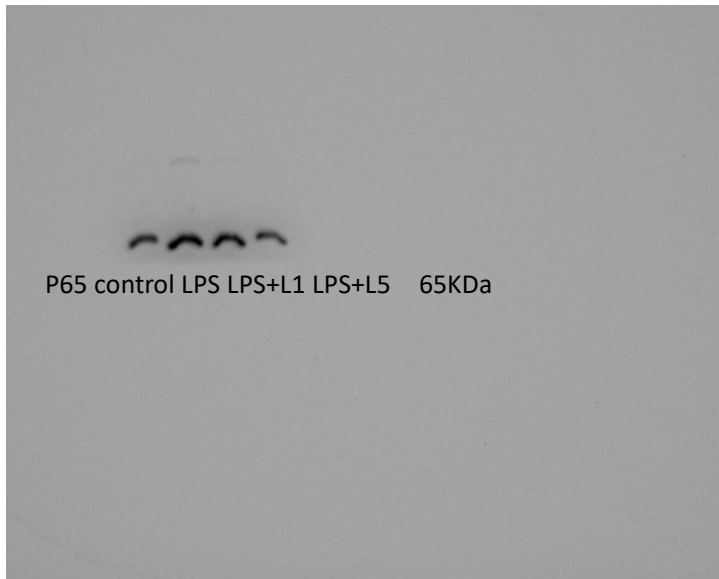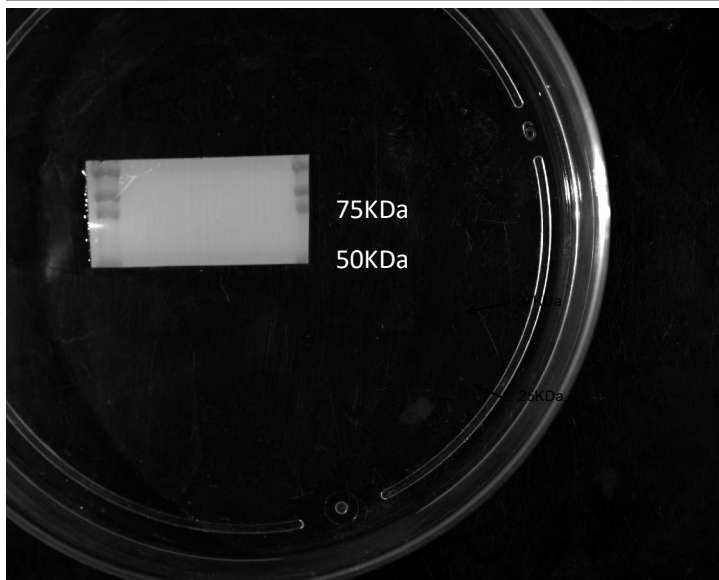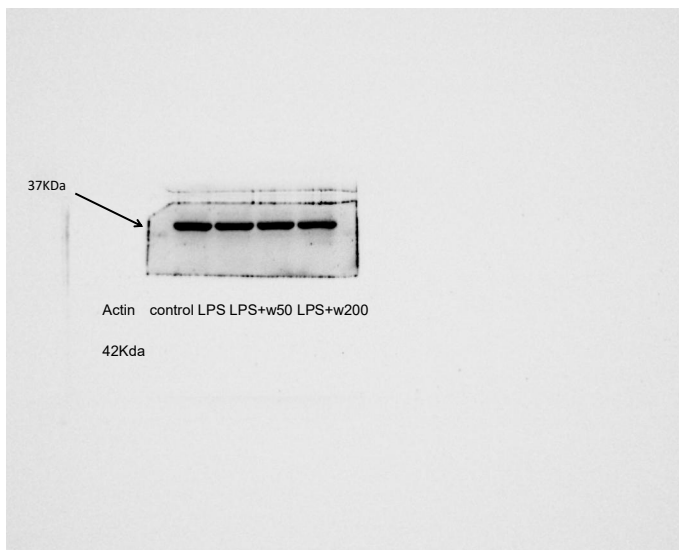

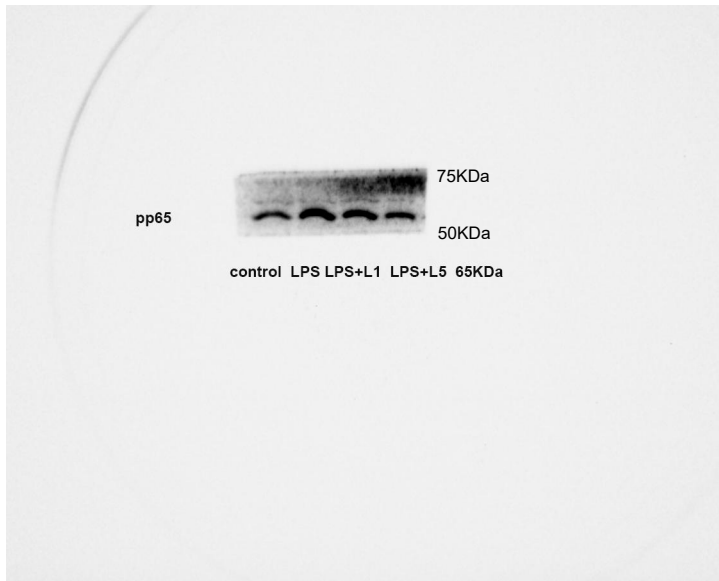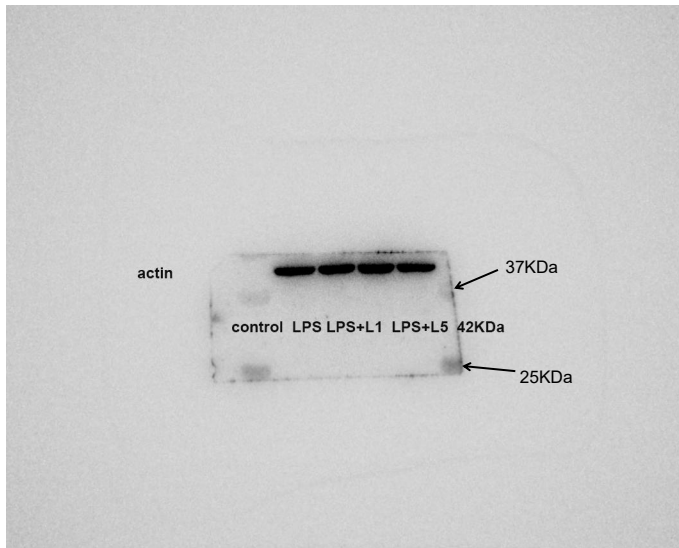

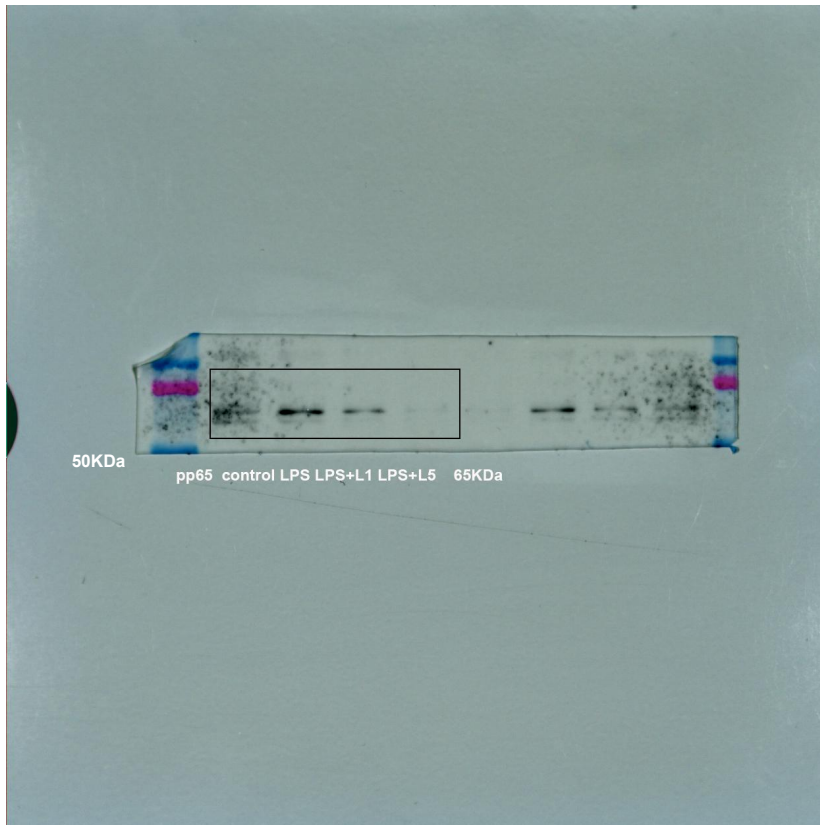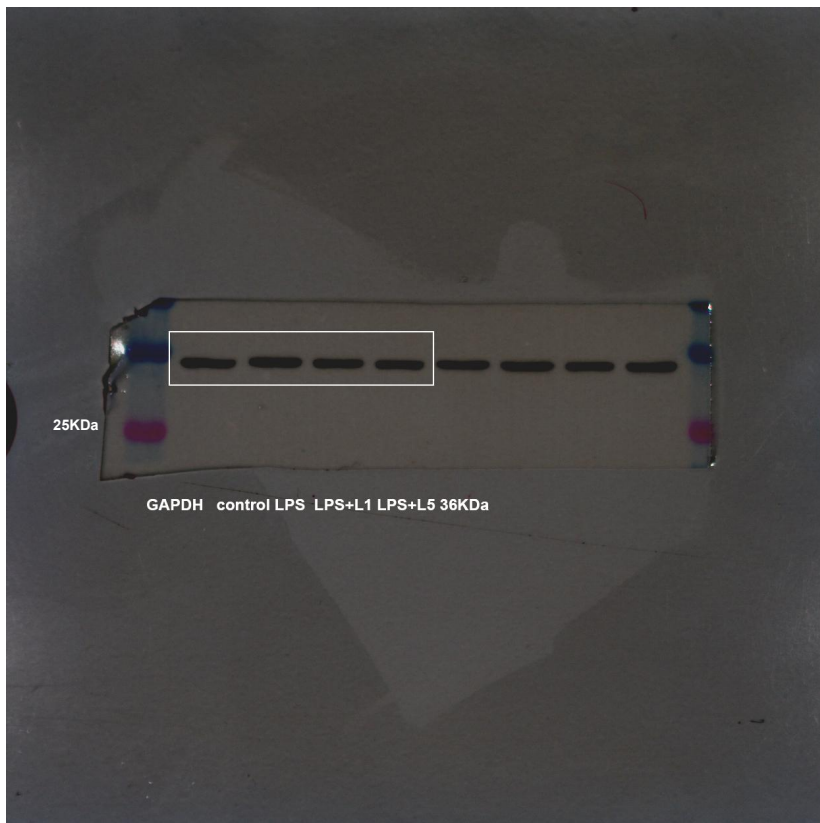

Fig 7F

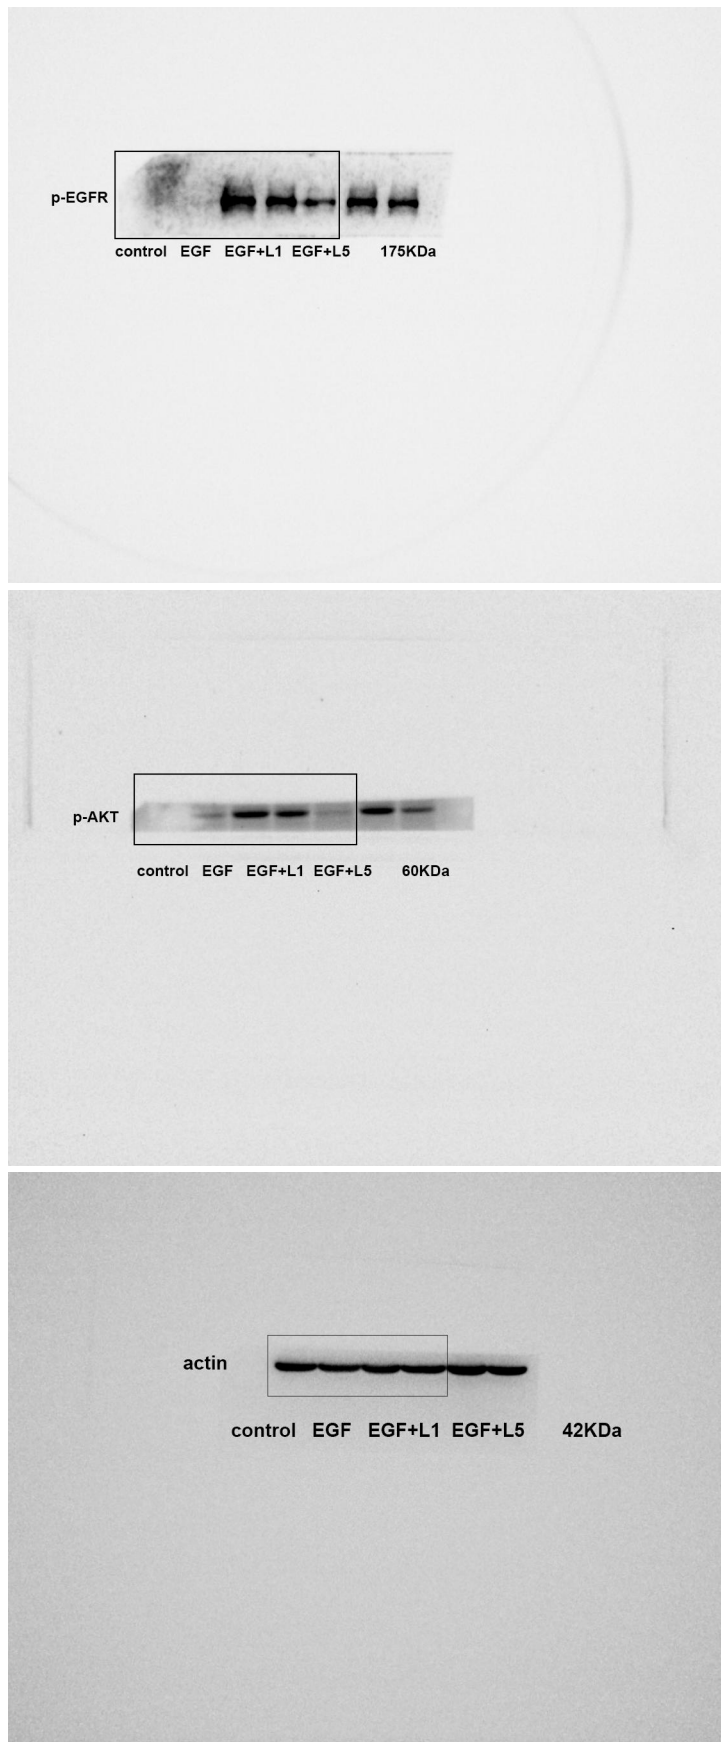

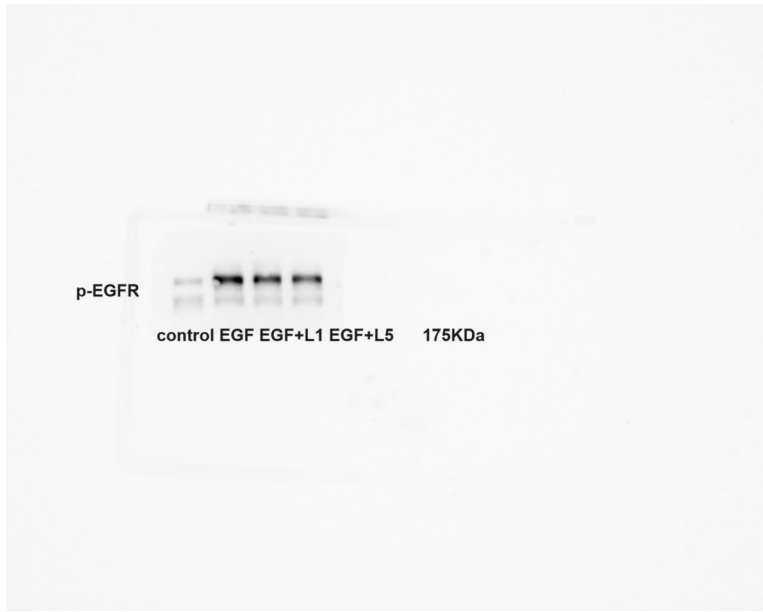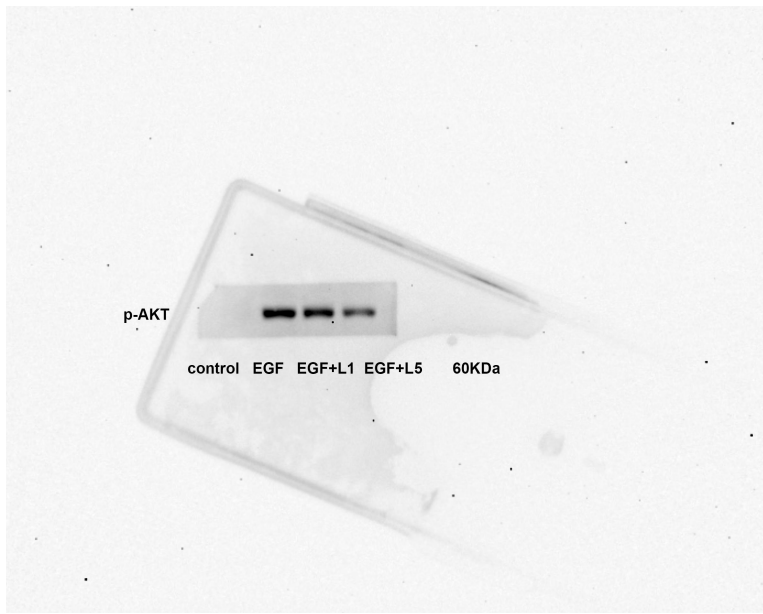

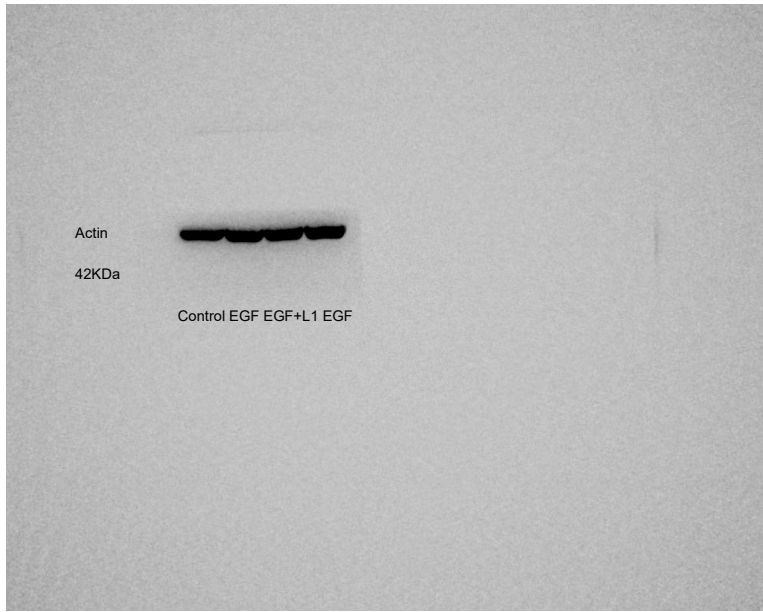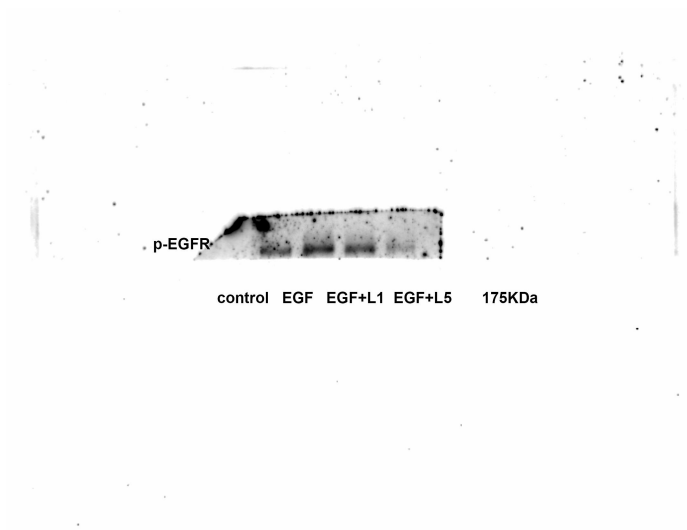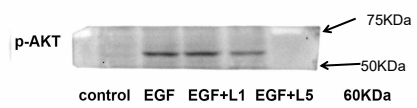

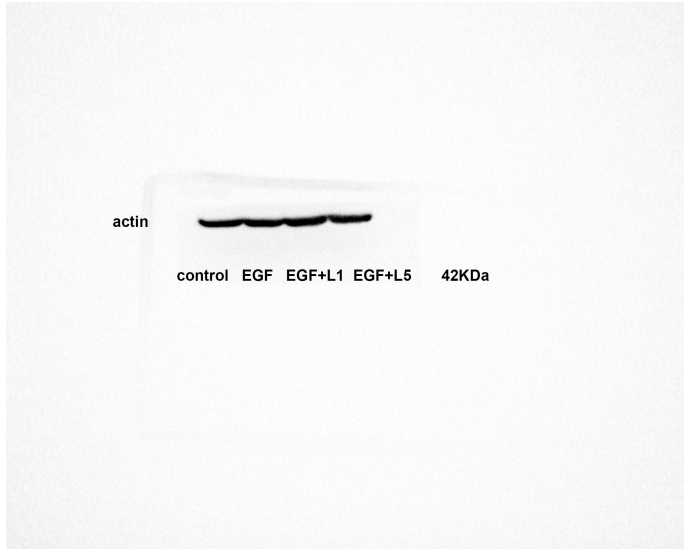

Supplement: MOESM3 [file 26524382]
